# Supplementary material
Source: PubMed Central journal article supplement (PMC6648002)
Supplement: ao9b00974_si_001.pdf [file ao9b00974_si_001.pdf]

# Optimized Stepwise Synthesis of the API Liraglutide using BAL-resin and pseudo-prolines

*Daniel Carbajo,<sup>1,2</sup> Ayman El-Faham,<sup>3,4</sup> Miriam Royo,<sup>1,2</sup> Fernando Albericio<sup>1,2,3,5,6\*</sup>*

<sup>1</sup> CIBER-BBN, Networking Centre on Bioengineering, Biomaterials and Nanomedicine, Barcelona Science Park, 08028 Barcelona 08028, Spain

<sup>2</sup> Institute of Advanced Chemistry of Catalonia (IQAC-CSIC), Spanish National Research Council (CSIC), 08034 Barcelona, Spain

<sup>3</sup> Department of Chemistry, College of Science, King Saud University, 2455, Riyadh, Saudi Arabia, 11451, Saudi Arabia

<sup>4</sup> Department of Chemistry, Faculty of Science, Alexandria University, 426, Alexandria, Egypt, 21321, Egypt

<sup>5</sup> Department of Organic Chemistry, University of Barcelona, 08028 Barcelona, Spain

<sup>6</sup> School of Chemistry and Physics, University of KwaZulu-Natal, Durban 4001, South Africa

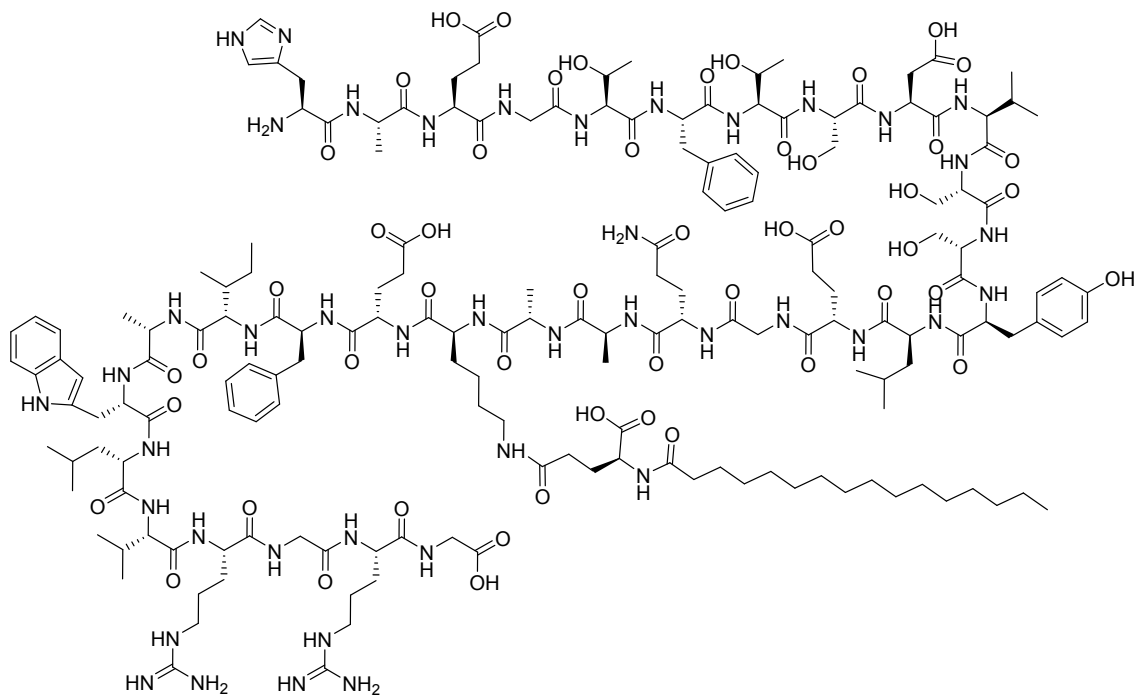

**Figure S 1:** Sequence of Liraglutide

***Liraglutide:***

Sequence: *H* - *His* - *Ala* - *Glu* - *Gly* - ***Thr*** - ***Phe*** - ***Thr*** - ***Ser*** - *Asp* - ***Val*** - ***Ser*** - *Ser* -  
Tyr - Leu - Glu - Gly - Gln - *Ala* - *Ala* - Lys(Palm) - Glu - Phe - Ile - Ala - Trp -  
Leu - Val - Arg - Gly - Arg - Gly - OH

Use of pseudoprolines was preferred for **bold** amino acids to assure best purities. Amino acids in *Italics* were introduced by using HCTU/DIEA. The rest amino acids were introduced by DIC/OxymaPure cocktail. Crude purity: 84%

Yield of synthesis after preparative purification: 69%

Chemical Formula: C<sub>172</sub>H<sub>265</sub>N<sub>43</sub>O<sub>51</sub> Expected MS of Liraglutide: 3752.3 (M+H).

Found MS: 1876.6 (M+H)<sup>2+</sup>, 1251.5 (M+H)<sup>3+</sup>, 938.9 (M+H)<sup>4+</sup> and 751.2 (M+H)<sup>5+</sup>.

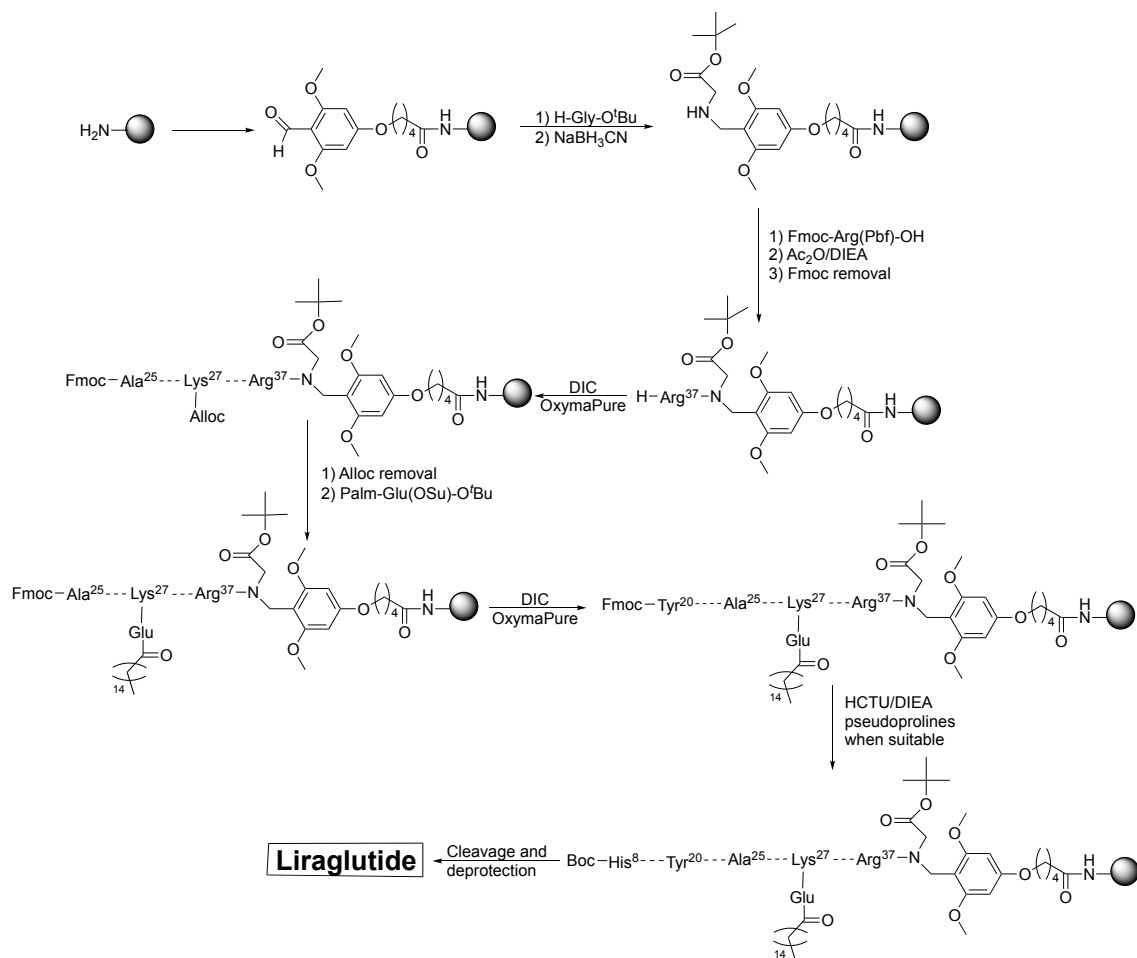

**Figure S 2:** Detailed final synthetic scheme towards **Liraglutide**

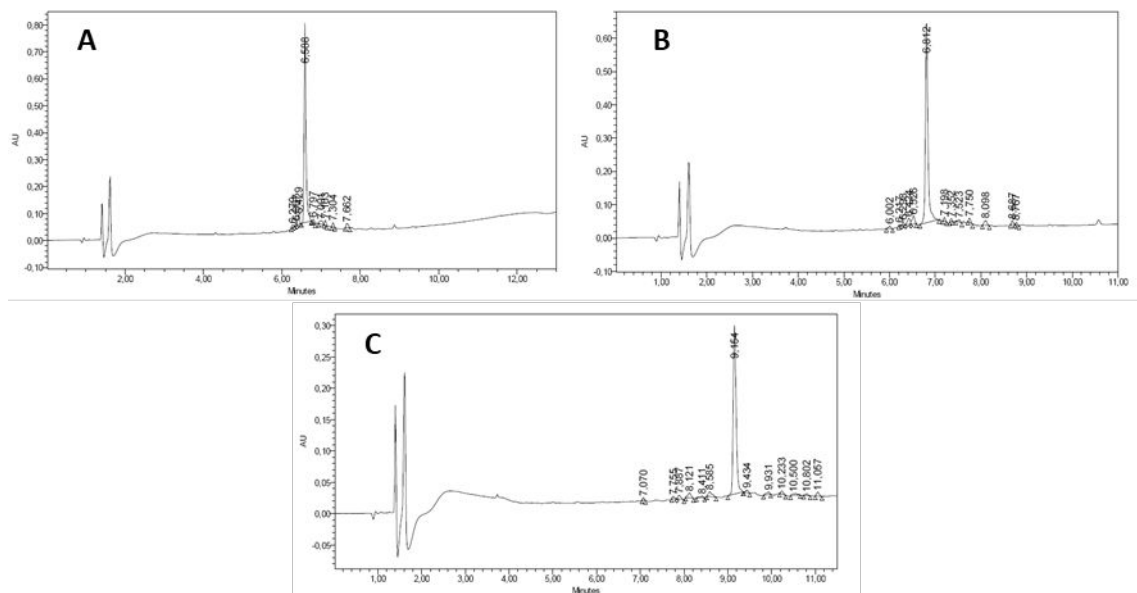

**Figure S 3:** HPLC traces of crude **Liraglutide**. (A) 5-100%ACN (0.1% TFA) in 10min. (B) 30-70%ACN (0.1% TFA) in 10min (C) 30-50%ACN (0.1% TFA) in 10min. 220nm.

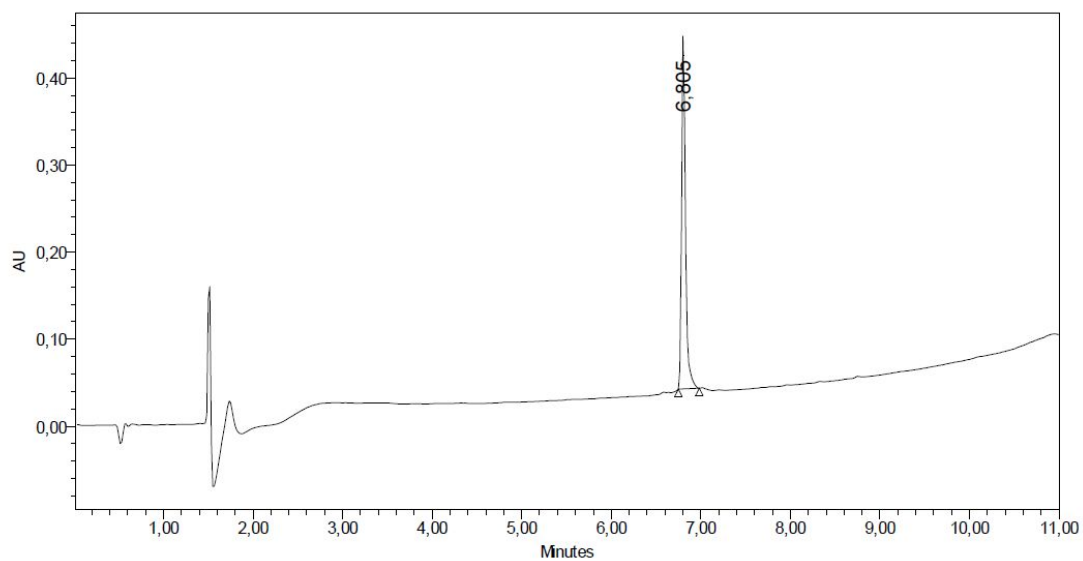

**Figure S 4:** HPLC trace of pure Liraglutide. 5-100%ACN (0.1% TFA) in 10min. 220nm.

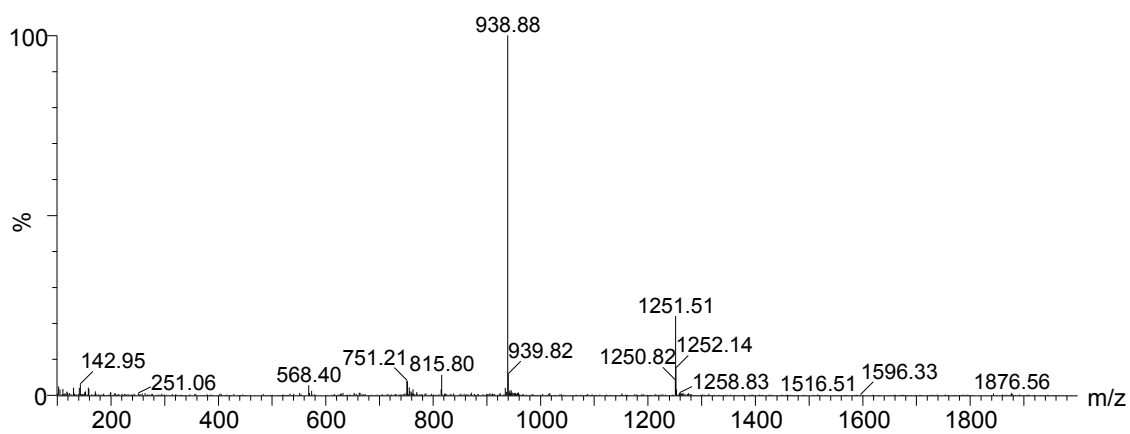

**Figure S 5:** MS trace of pure Liraglutide (ESI)

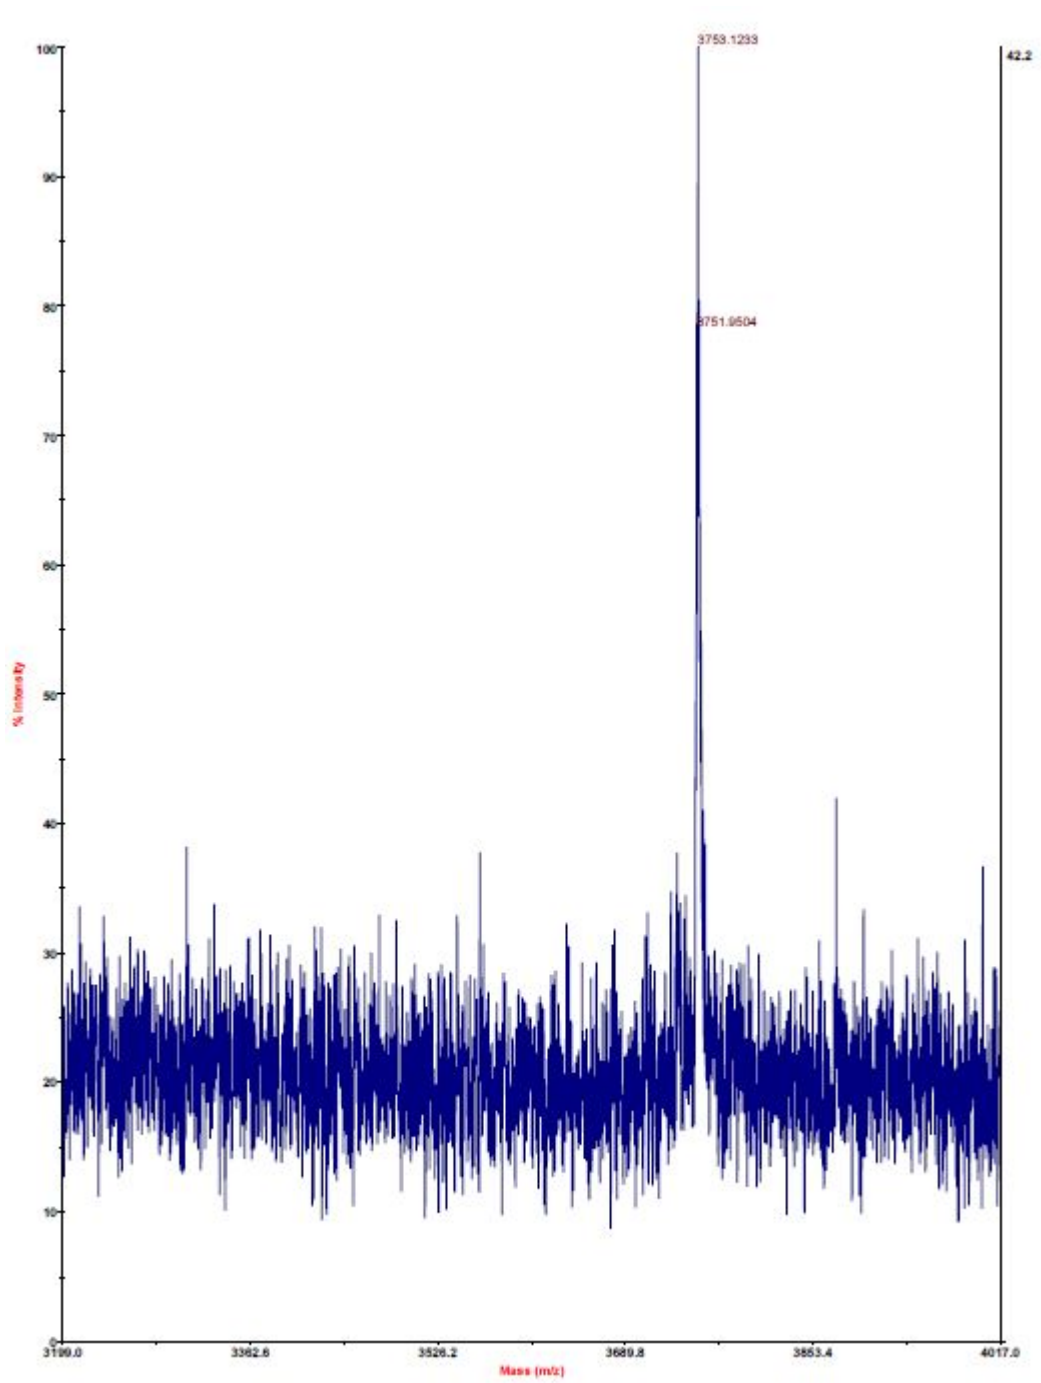

Figure S 6: MS trace of pure Liraglutide (MALDI)
